# Supplementary material for: Boron–manganese–carbon nanocomposites synthesized from CO2for electrode applications in both supercapacitors and fuel cells
Source: Royal Society of Chemistry journal article supplement (doi:10.1039/c6ra10061a), 2016-01-01
Supplement: c6ra10061a1.pdf [file c6ra10061a1.pdf]

## Electronic Supplementary Information

Boron-manganese-carbon nanocomposites  
synthesized from CO<sub>2</sub> for electrode applications in  
both supercapacitor and fuel cell

Yeeun Kim<sup>a</sup>, Wonhee Lee<sup>a,b</sup>, Gi Mihn Kim<sup>a</sup> and Jae W. Lee<sup>a\*</sup>

<sup>a</sup> Department of Chemical and Biomolecular Engineering, Korea

Advanced Institute of Science and Technology (KAIST), 291

Daehak-ro, Yuseong-gu, Daejeon 305-701, Republic of Korea <sup>b</sup>

Climate Change Research Division, Korea Institute of Energy

Research (KIER), 152 Gajeong-ro, Yuseong-gu, Daejeon 34129,

Republic of Korea

### **S.1 The conversion of potentials against a reversible hydrogen electrode (RHE)**

To compare with other studies, the measured potential with respect to Ag/AgCl as a reference electrode can be converted against reversible hydrogen electrode (RHE) by following equation (S1):

$$E_{RHE} = E_{Ag/AgCl} + 0.059 pH + E_{Ag/AgCl}^{\circ} \quad (S1)$$

Where  $pH$  is 13.6 in 1.0 M NaOH, and  $E_{Ag/AgCl}^{\circ}$  is 0.1976 V at 25 °C.<sup>1</sup>

## S.2 The RRDE measurement

The electron transfer number ( $n$ ) and hydrogen peroxide yield ( $x_{H_2O_2}$ ) for ORR were determined by using RRDE measurement data with equations (S2) and (S3).

$$n = \frac{4I_D}{I_D + I_R/N} \quad (S2)$$

$$x_{H_2O_2} = \frac{2I_R/N}{I_D + I_R/N} \quad (S3)$$

Where  $I_D$  is the disk current (A),  $I_R$  is the ring current (A), and  $N$  is the RRDE collection efficiency, which was 0.424 herein <sup>2</sup>.

### S.3 The specific capacitance equation

The specific capacitance was calculated from the galvanostatic charge/discharge curves using equation (S4).

$$C_{GCD} = \frac{I\Delta t}{m\Delta V} \quad (\text{S4})$$

where  $I$  is the constant current density,  $\Delta t$  is the discharging time,  $m$  is the mass of only BPCMO material used for the working electrode, and  $\Delta V$  is the discharging voltage change<sup>3</sup>.

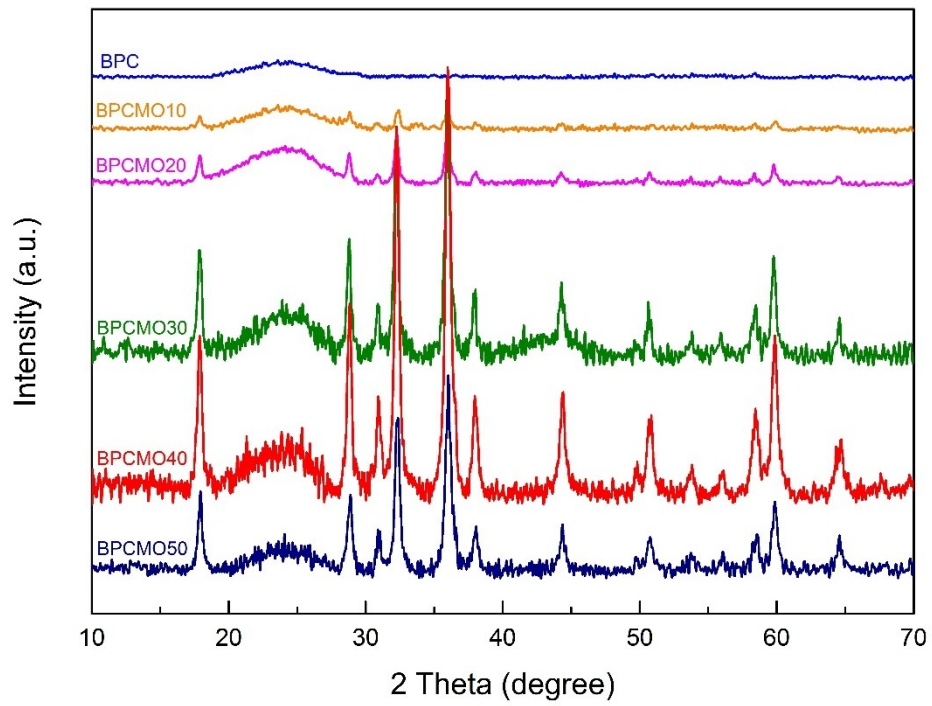

**Fig. S1** XRD spectra of BPC and BPCMOs.

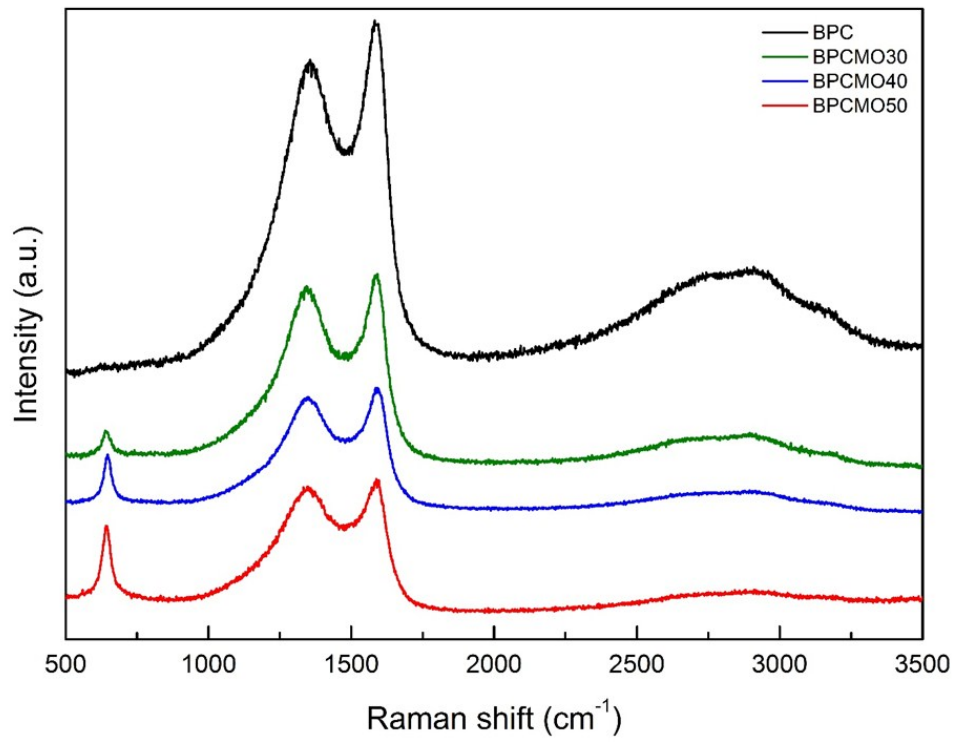

**Fig. S2** Raman spectra of BPC and BPCMOs.

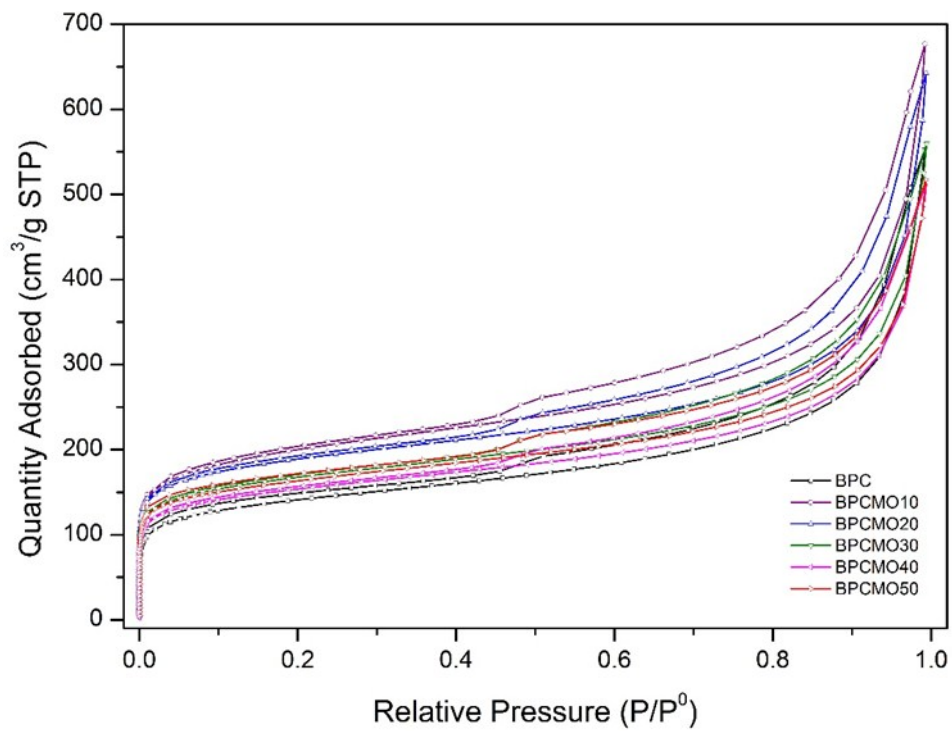

**Fig. S3** Nitrogen adsorption isotherms of BPC series.

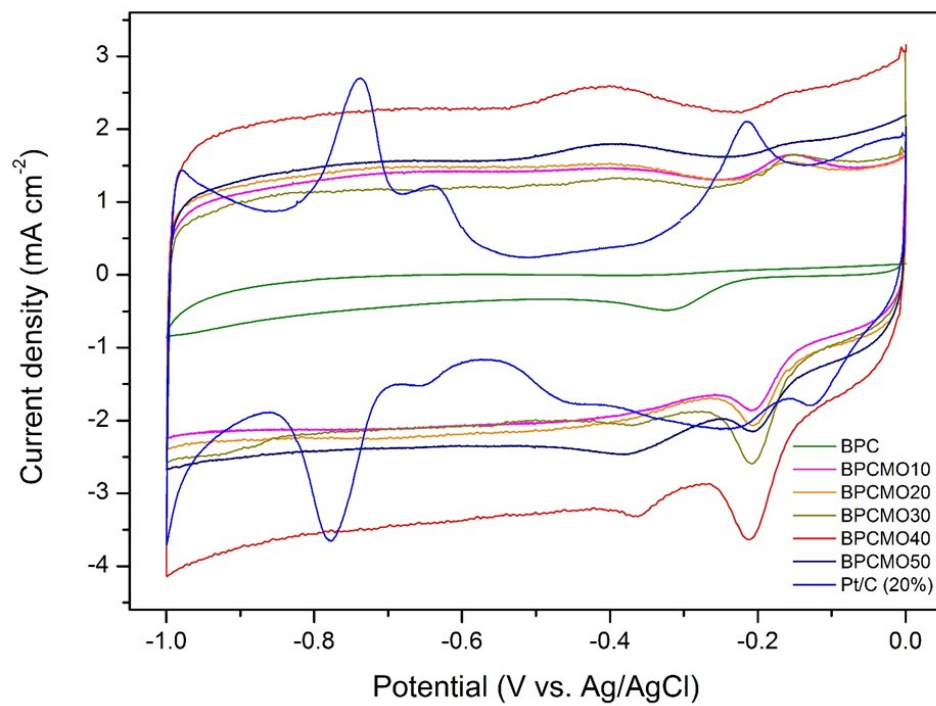

**Fig. S4** CV of Pt/C (20wt%) and BPCMO series (scan rate = 50 mVsec<sup>-1</sup>).



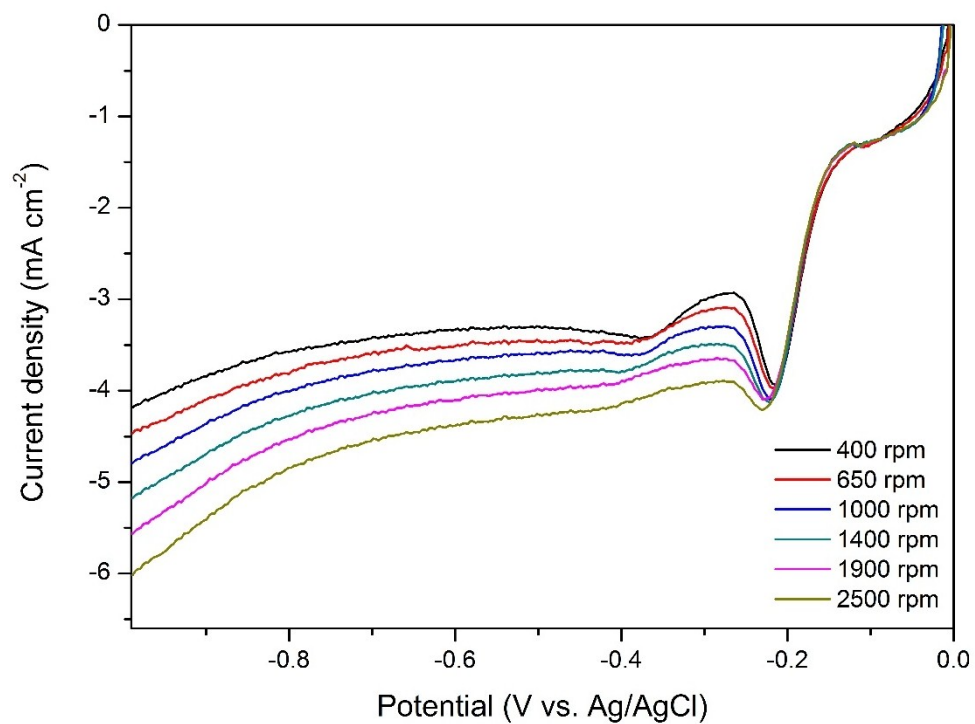

**Fig. S5** LSV of BPCMO40 according to different rotation speeds (scan rate = 50 mVsec<sup>-1</sup>).

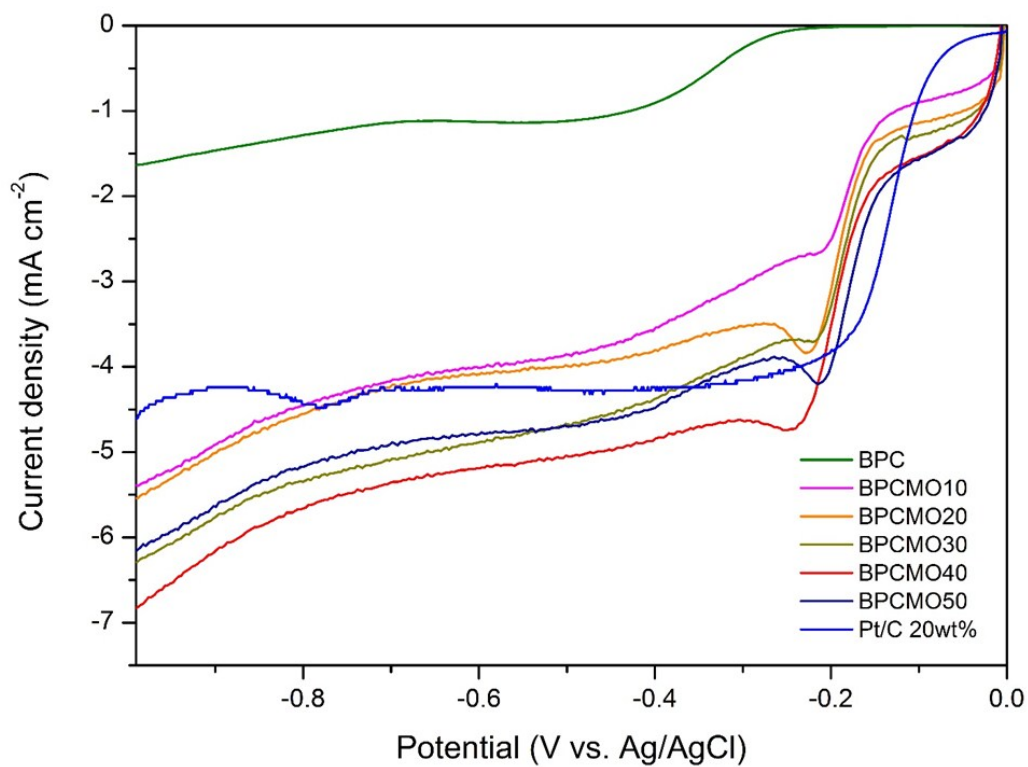

**Fig. S6** LSV of BPCMO series at 2500 rpm and at a scan rate of 50 mVsec<sup>-1</sup>.

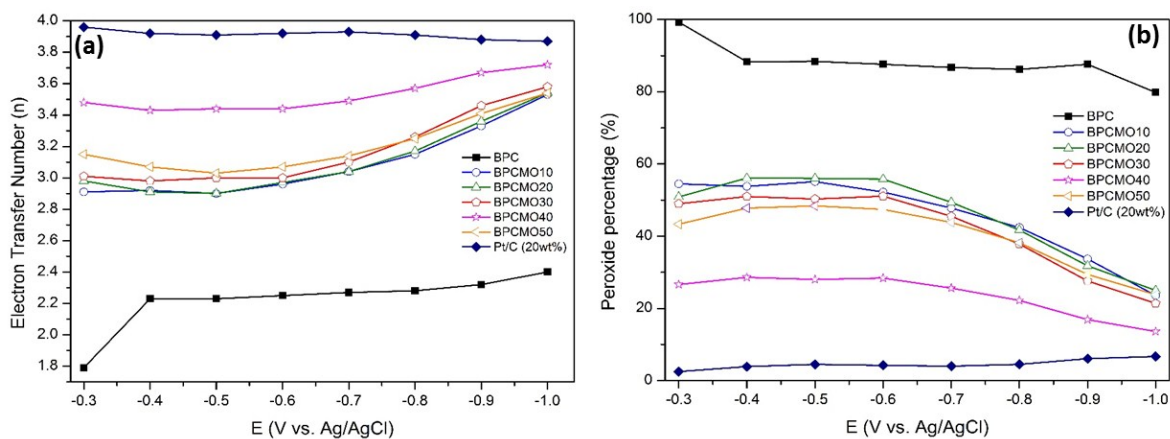

**Fig. S7** (a) Electron transfer number (n) and (b) the amount of peroxide ( $\text{HO}_2^-$ ) of BPCMO series, calculated from RRDE data at 2500 rpm and at a scan rate of 50 mV sec<sup>-1</sup>.

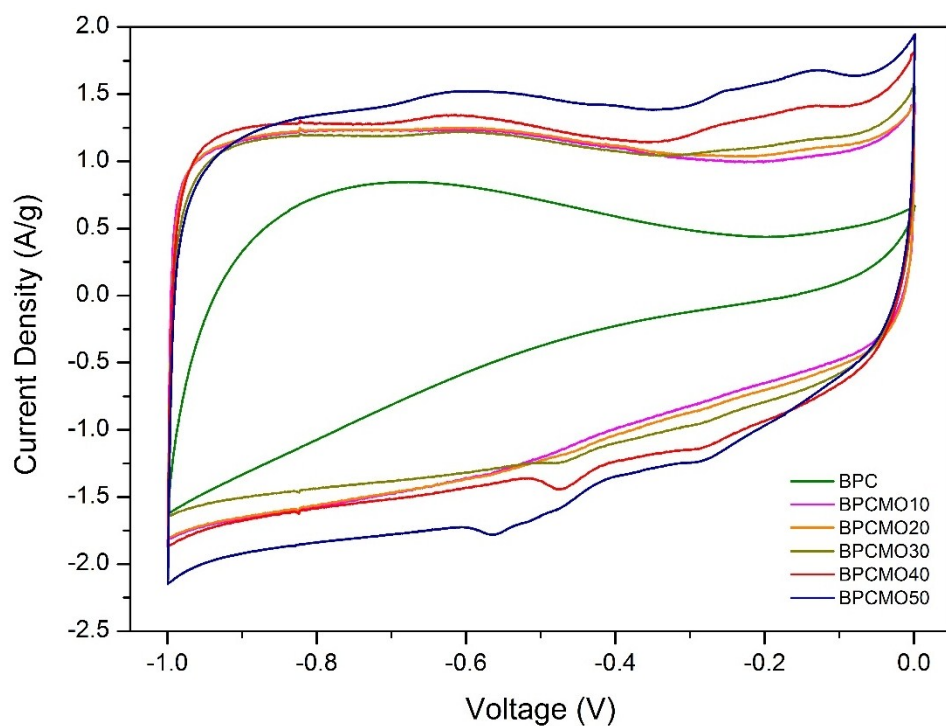

**Fig. S8** CV curves of BPCMO series with potential window from -1.0 to 0.0 V at a scan rate of 10 mV sec<sup>-1</sup>.

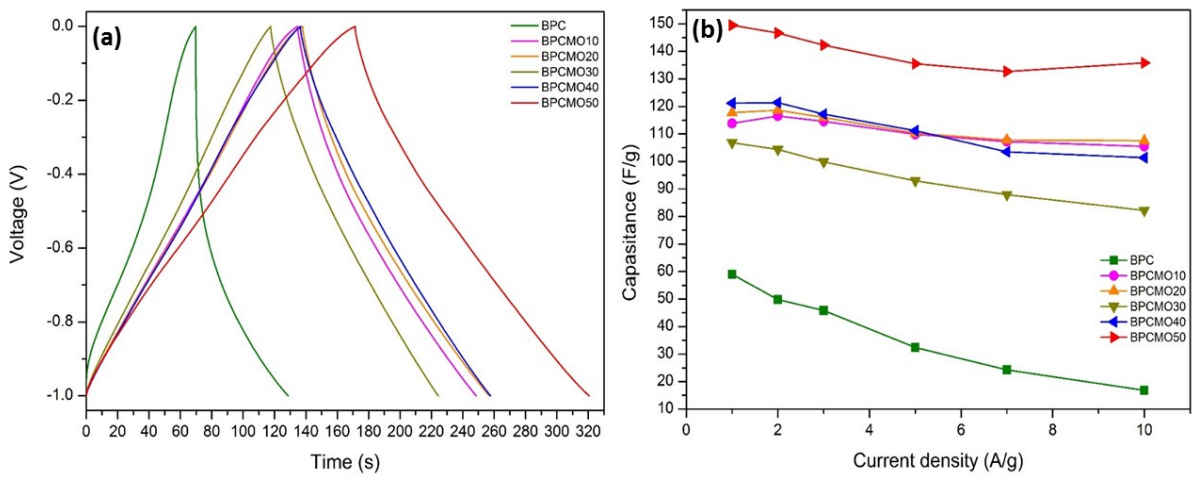

**Fig. S9** Galvanostatic charge/discharge curves of BPCMO series at 1A/g in 6 M KOH and their specific capacitance at different current density.

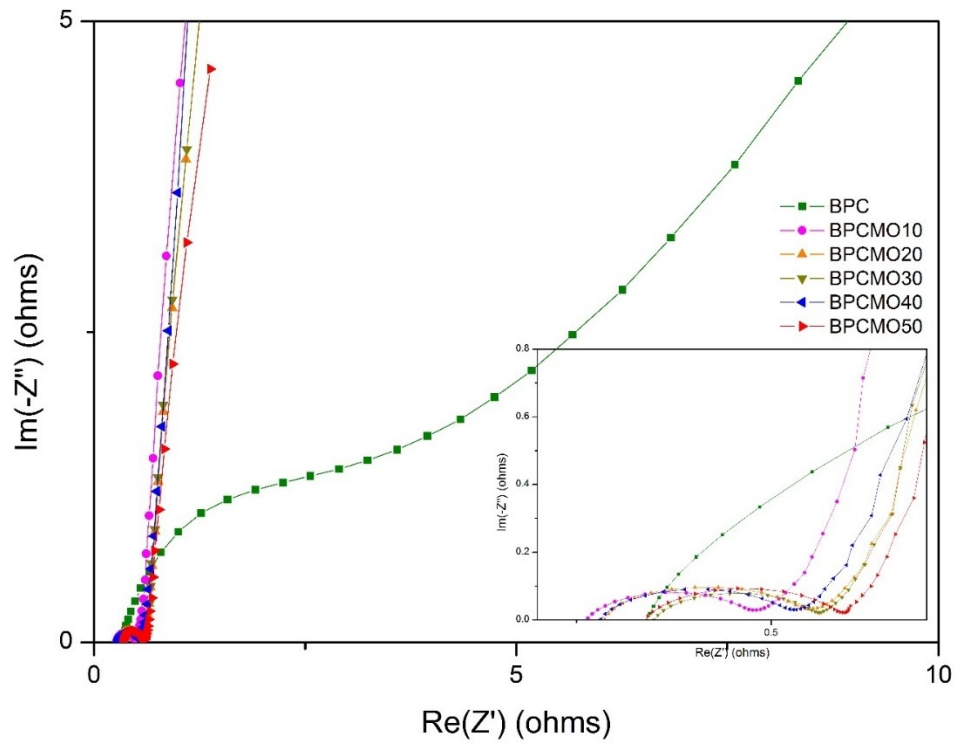

**Fig. S10** Nyquist plots of BPCMO series using a sinusoidal signal of 10 mV over the frequency range from 100 kHz to 0.05 Hz.

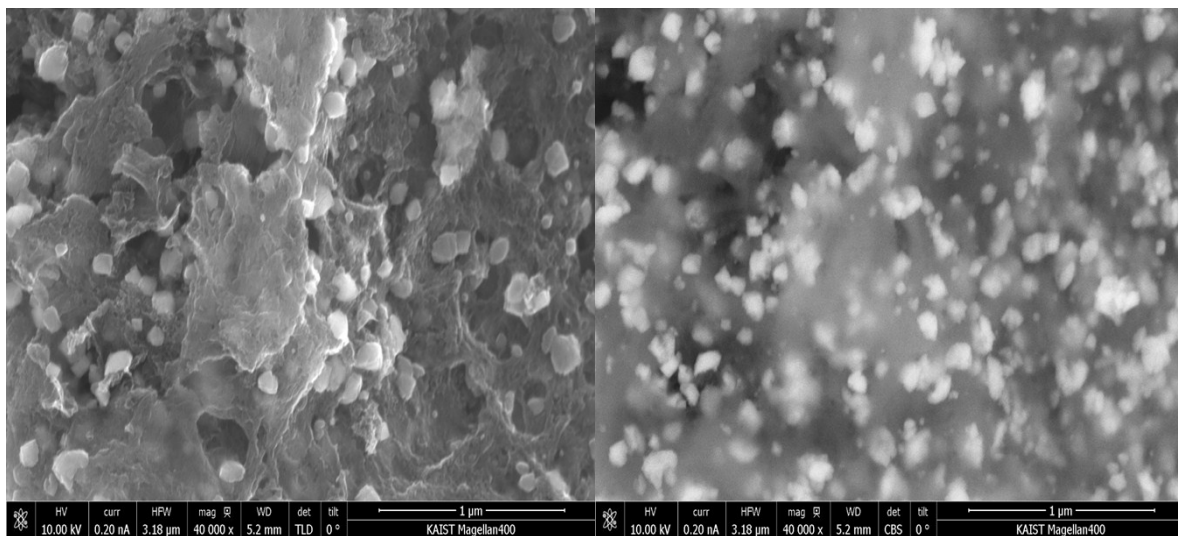

**Fig. S11** SEM images of BPCMO50 after cycling test (3500 cycles) at 2 A g<sup>-1</sup>.

## Reference

1. Kim, G. M.; Baik, S.; Lee, J. W. Enhanced oxygen reduction from the insertion of cobalt into nitrogen-doped porous carbons. *RSC Adv.* **2015**, *5*, 87971-87980.
2. Baik, S.; Lee, J. W. Effect of boron-nitrogen bonding on oxygen reduction reaction activity of BN Co-doped activated porous carbons. *RSC Adv.* **2015**, *5*, 24661-24669.
3. Chen, S. M.; Ramachandran, R.; Mani, V.; Saraswathi, R. Recent advancements in electrode materials for the high-performance electrochemical supercapacitors: a review. *Int. J. Electrochem. Sci.* **2014**, *9*, 4072-4085.
